# Supplementary material for: The genetic basis of natural variation in a phoretic behavior
Source: PubMed Central journal article supplement (PMC5561207; doi:10.1038/s41467-017-00386-x), 2017-08-17
Supplement: 41467_2017_386_MOESM1_ESM.pdf [file 41467_2017_386_MOESM1_ESM.pdf]

File Name: Supplementary Information

Description: Supplementary Figures and Supplementary Tables.

File Name: Supplementary Movie 1

Description: **Caenorhabditis dauer larva hitchhiking on a small beetle** Dauer larva of *C. latens* nictating on the back of a fast-walking beetle on the surface of a rotten apple.

File Name: Supplementary Movie 2

Description: **Nictating Caenorhabditis dauer larva** Dauer larva of *C. latens* nictating on the tip of a rotten apple.

File Name: Supplementary Data 1

Description: **Natural variation of nictation behavior** Nictation fractions of 12 divergent *C. elegans* wild isolates are included.

File Name: Supplementary Data 2

Description: **Nictation variation among RIAIL strains** Nictation fractions of 186 recombinant inbred advanced intercross lines (RIAILs) are included.

File Name: Supplementary Data 3

Description: **NIL-based fine mapping of *nict-1* QTL** Nictation fractions of near isogenic lines (NILs) are included.

File Name: Supplementary Data 4

Description: **Genomic variants in *nict-1* QTL** Genomic features and variants of NILnarrowed 73 kb *nict-1* QTL are included.

File Name: Supplementary Data 5

Description: **Expression analysis for *nict-1* QTL** Expression levels of genes in the NILnarrowed 73 kb *nict-1* QTL are included.

File Name: Supplementary Data 6

Description: **Candidate gene assay** Nictation fractions of strains with deletion mutations in genes in the NIL-narrowed 73 kb *nict-1* QTL are included.

File Name: Supplementary Data 7

Description: **Brood size assay** Brood sizes of the parental and NIL strains are included.

File Name: Supplementary Data 8

Description: **Transmission competition assay** Isopod transmission competition assay allele frequencies are included.

File Name: Peer Review File

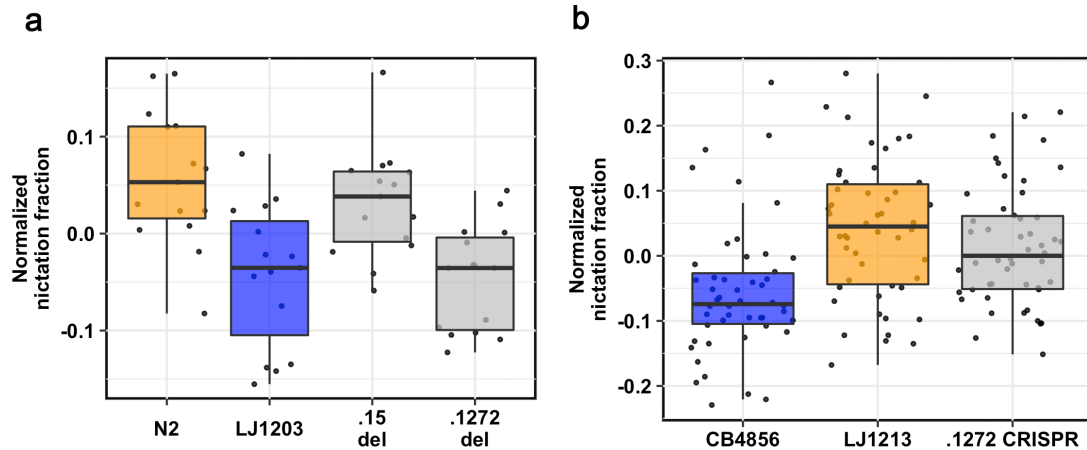

**Supplementary Figure 1. The nictation difference is not regulated by protein-coding genes in *nict-1* QTL.** Tukey box plots of normalized nictation percent of are shown with data points plotted behind. The horizontal line in the box is the median, and the box denotes the 25<sup>th</sup> to 75<sup>th</sup> quantiles of the data. The vertical line represents the 1.5 inter-quartile range. **(a)** N2 (orange), LJ1203 (*nict-1* CB4856>N2, blue), FX1161 *Y105C5A.15(tm1161)* and FX6979 *Y105C5A.1272(tm6979)* were scored in 15 biological replicates. **(b)** CB4856(blue), LJ1213 (*nict-1* N2>CB4856, orange) and LJ1216 (*nict-1* N2>CB4856); *Y105C5A.1272(snu33)* were scored in 50 biological replicates.

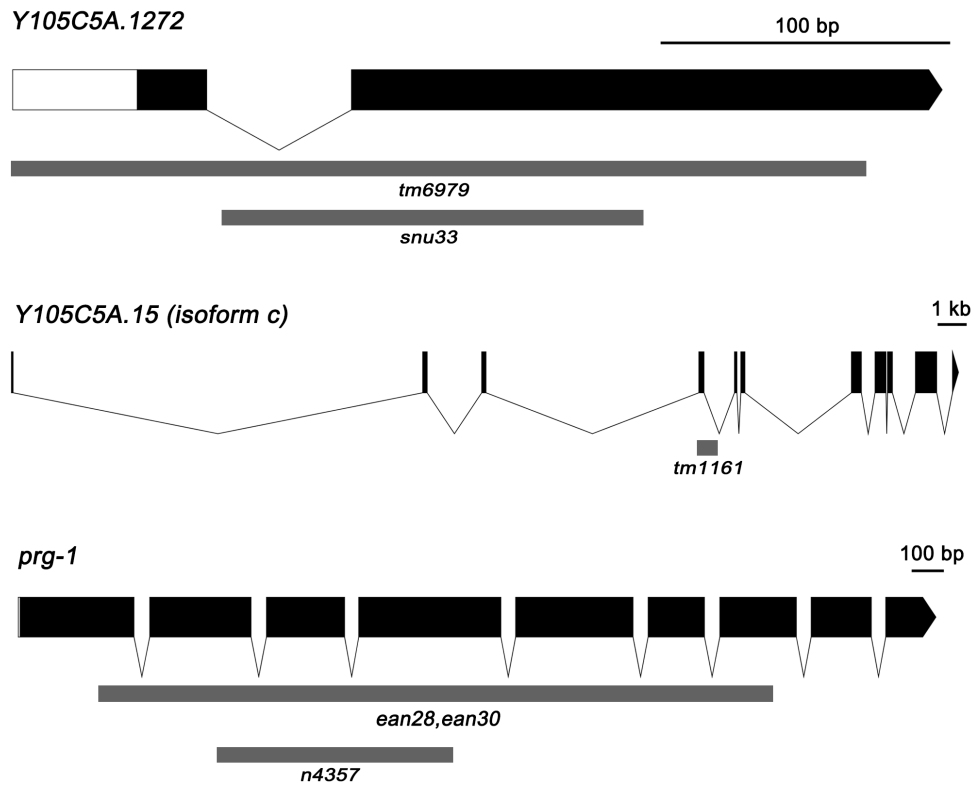

**Supplementary Figure 2. Deletion mutations in candidate genes and the *prg-1* gene.** The locations and sizes of the deletions are marked by gray rectangles.

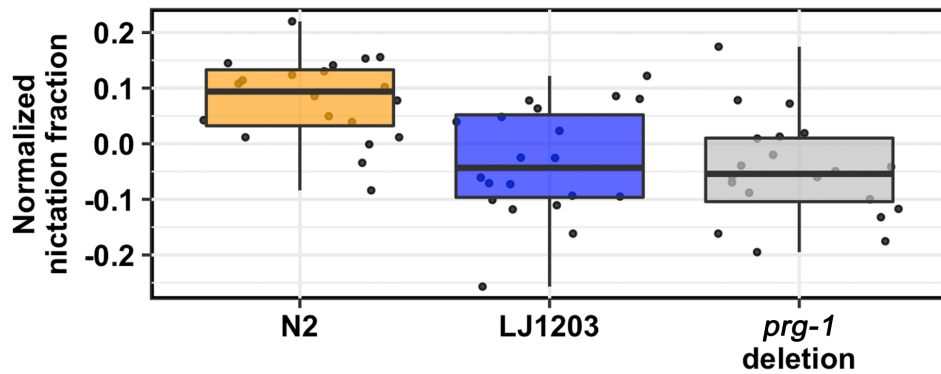

**Supplementary Figure 3. An independent *prg-1* mutation allele causes a decrease in nictation frequency.** Tukey box plots of normalized nictation percent of N2 (orange), LJ1203 (*nict-1* CB4856>N2, blue), and ECA286 *prg-1*(*n4357*) are shown with data points plotted behind. The horizontal line in the box is the median, and the box denotes the 25<sup>th</sup> to 75<sup>th</sup> quantiles of the data. The vertical line represents the 1.5 inter-quartile range. All strains were scored in 20 biological replicates.

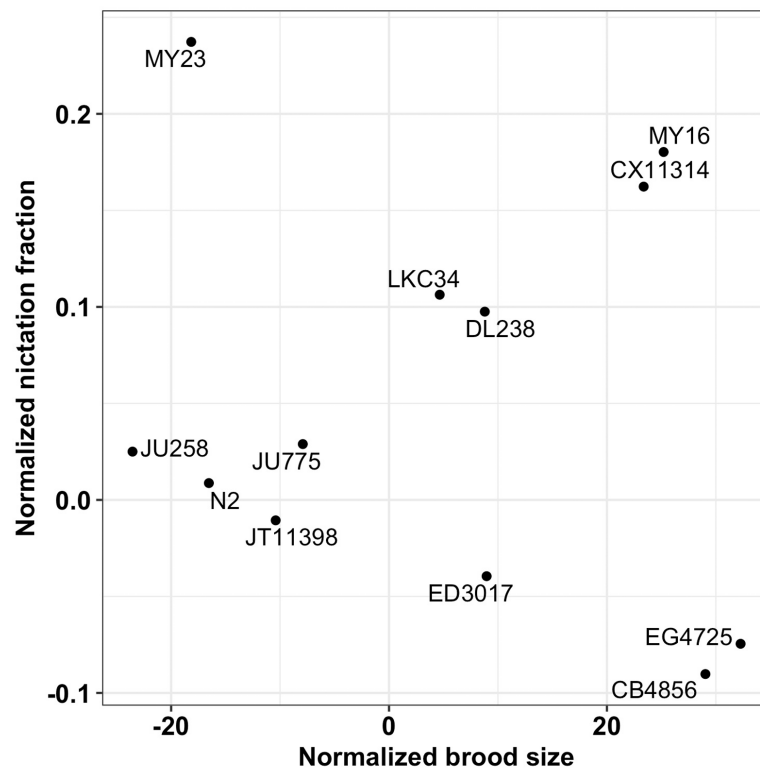

**Supplementary Figure 4. The correlation between nictation and offspring production of wild isolates were analyzed.** A scatter plot of normalized nictation fractions and normalized brood sizes of 12 *C. elegans* wild isolates are shown.

| <b>Strain</b> | <b>Left breakpoint marker</b>                                | <b>Right breakpoint marker</b>                 |
|---------------|--------------------------------------------------------------|------------------------------------------------|
| LJ1205        | 15,363,068 (haw64325)<br>15,399,910 (haw64411)               | 15,721,883(haw64913)<br>15,731,721(CE4-211)    |
| LJ1206        | 15,363,068 (haw64325)<br>15,399,910 (haw64411)               | 15,570,359 (haw64768)<br>15632637 (CE4-210)    |
| LJ1207        | 15,731,721 (CE4-211)<br>15,769,804 (haw64984)                | 15,874,012 (haw65181)<br>15,907,604 (haw65266) |
| LJ1209        | 15,363,068 (haw64325)<br>15,399,910 (haw64411)               | 15,731,721 (CE4-211)<br>15,769,804 (haw64984)  |
| LJ1210        | 15,363,068 (haw64325)<br>15,399,910 (haw64411)               | 15,787,240 (haw65037)<br>15,812,722 (haw65069) |
| LJ1211        | 15,714,544 (cewivar00695185)<br>15,718,040 (cewivar00695189) | 15,874,012 (haw65181)<br>15,907,604 (haw65266) |
| LJ1212        | 15,363,068 (haw64325)<br>15,399,910 (haw64411)               | 15,645,536 (haw64838)<br>15,646,308 (haw64840) |
| LJ1213        | 15,644,563 (cewivar00215554)<br>15,645,536 (haw64838)        | 15,787,240 (haw65037)<br>15,812,722 (haw65069) |
| LJ1215        | 15,589,708 (haw64785)<br>15,641,444 (haw64835)               | 15,731,721 (CE4-211)<br>15,769,804 (haw64984)  |

**Supplementary Table 1.** Breakpoint markers for the generation of near isogenic lines (NILs)

| <b>Position</b> | <b>Forward primer</b>           | <b>Reverse primer</b>          |
|-----------------|---------------------------------|--------------------------------|
| 15,363,068      | CCGTACCTCGGAAGTTGAAA            | AAGAGCCATAACACATGAGCTG         |
| 15,399,910      | ATGGTGGTTTTCAAGAGTTTTCA         | GCTGGAATCAATTAAGAAATTA<br>CAA  |
| 15,570,359      | TGACCGAAAATGAAAATTCG            | TCCCTTACTCACCTGTCACTT          |
| 15,570,612      | TGACCGAAAATGAAAATTCG            | TCCCTTACTCACCTGTCACTT          |
| 15,589,708      | TGCGGTAAAGTCGAATTTTTA           | AAAAGCAATGCTGATGATGC           |
| 15,632,637      | ATCGGATGTTTCAGCTTGTGG           | ATACGGAGGATTTTGCATGTCC         |
| 15,641,444      | AGGCGAATGACTCATGCTTT            | AGCCAAAATGCCCACTACAC           |
| 15,644,563      | CATTGGCTGGTCCCCTC               | AAATGTTGGCCTTGTTGAAAA          |
| 15,645,536      | TTTTCAACAAGGCCAACATTT           | AATGATCCGCAACTTTTTTCG          |
| 15,646,308      | TGGTATTGTAGAAAATAAAAAG<br>TTCCA | AAAGGGTGAGTACGCAATGG           |
| 15,696,457      | TCGAAAATTCTAAAACCGAACT          | AAAACGGAAGGACATGTTGTG          |
| 15,714,544      | GCCCCATCGAAACAGTAGAA            | CGTGGGAAAACACACACTGA           |
| 15,718,040      | CAACCAATATCACGCTGTCG            | CGCCACGCAGTTTCTTATTT           |
| 15,721,883      | TTCATGATGTTTCAATTTATTTTTG<br>GA | TTTCTGTCACAGCCAAGTTCA          |
| 15,731,721      | ACCATTCTTTCAGATTGTTCTT          | CAATACTGATGAAAACACTGTTTG<br>A  |
| 15,769,804      | TCACCACTGGTTTTCACTTCA           | AAAAGTGTGAATTCGTTTTGG<br>A     |
| 15,787,240      | TTTCAAATGTGCTTTGCTAATGA         | AAATTTTGAACAGGAACAAAA<br>A     |
| 15,812,722      | AAAATCAGAATTTGAACTGTTTT<br>GG   | CATCGAAAATTTACAGTTTCAC<br>ATTA |
| 15,874,012      | GCTCCGCTGAGCACTAAAGA            | TGAAGGATGCGATACTCTCTCT<br>C    |
| 15,907,604      | AGCATTTCTCACGCGCAG              | TTTTGCTGTTTCGAATCAAACA         |
| 16,003,539      | ATCTTTGAAGCAGCGGACAT            | TTGAAAGTTTACAAGTCAAGCA<br>CA   |

**Supplementary Table 2.** Primer sequences for the markers used to genotype the NILs
